# Supplementary material for: Chemosensitizing effect of pentoxifylline in sensitive and multidrug-resistant non-small cell lung cancer cells
Source: PubMed Central journal article supplement (PMC11149106; doi:10.20517/cdr.2024.04), 2024-05-20
Supplement: cdr-7-19-SupplementaryMaterials.pdf [file cdr-7-19-SupplementaryMaterials.pdf]

## Supplementary Materials

### **Chemosensitizing effect of pentoxifylline in sensitive and multidrug-resistant non-small cell lung cancer cells**

**Beatriz S. Matos<sup>1,2</sup> , Sara Peixoto da Silva<sup>1,2,3</sup> , M. Helena Vasconcelos<sup>1,2,3</sup> ,  
Cristina P. R. Xavier<sup>1,2,4,5</sup> **

<sup>1</sup>i3S - Instituto de Investigação e Inovação em Saúde, Universidade do Porto, Rua Alfredo Allen 208, Porto 4200-135, Portugal.

<sup>2</sup>Cancer Drug Resistance Group, IPATIMUP - Institute of Molecular Pathology and Immunology of the University of Porto, Rua Alfredo Allen 208, Porto 4200-135, Portugal.

<sup>3</sup>Department of Biological Sciences, FFUP - Faculty of Pharmacy, University of Porto, Rua de Jorge Viterbo Ferreira 228, Porto 4050-313, Portugal.

<sup>4</sup>UCIBIO - Applied Molecular Biosciences Unit, Toxicologic Pathology Research Laboratory, University Institute of Health Sciences (1H-TOXRUN, IUCS-CESPU), Gandra 4585-116, Portugal.

<sup>5</sup>Associate Laboratory i4HB - Institute for Health and Bioeconomy, University Institute of Health Sciences - CESPU, Gandra 4585-116, Portugal.

**Correspondence to:** Prof. M. Helena Vasconcelos, Dr. Cristina P. R. Xavier, i3S - Instituto de Investigação e Inovação em Saúde, Universidade do Porto, Rua Alfredo Allen 208, Porto 4200-135, Portugal. E-mail: [hvasconcelos@ipatimup.pt](mailto:hvasconcelos@ipatimup.pt); [cristinax@ipatimup.pt](mailto:cristinax@ipatimup.pt)

A)

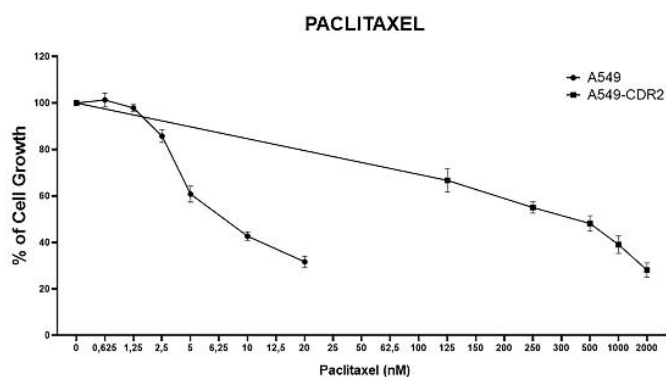

B)

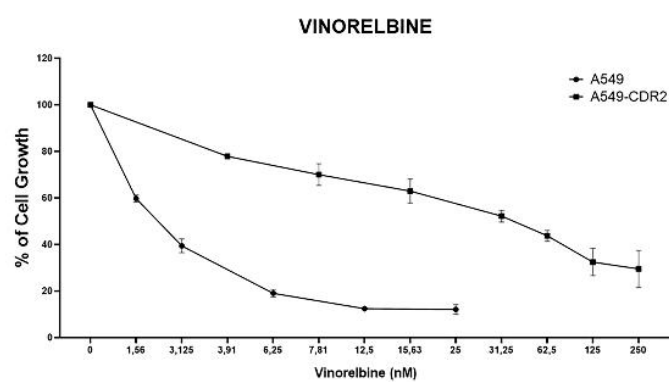

C)

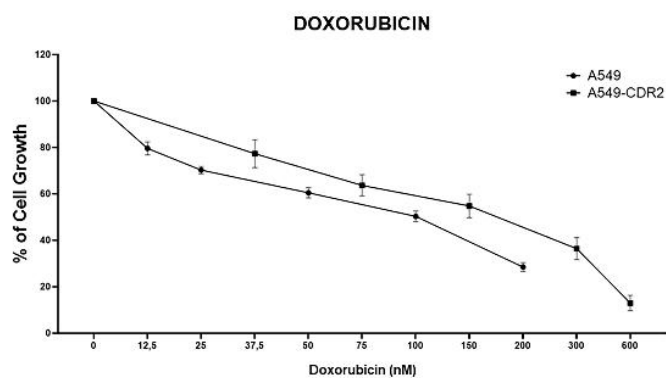

**Supplementary Figure 1.** Concentration-response curves of (A) paclitaxel, (B) vinorelbine and (C) doxorubicin on A549 vs. A549-CDR2 cell lines. Data is presented as percentage of cell growth and are the mean  $\pm$  SEM of a minimum of three independent experiments.

A)

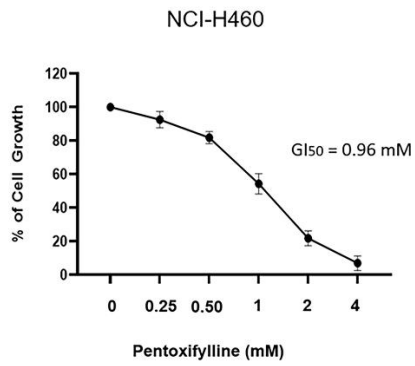

B)

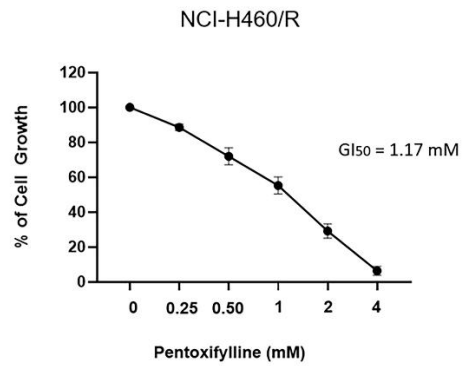

C)

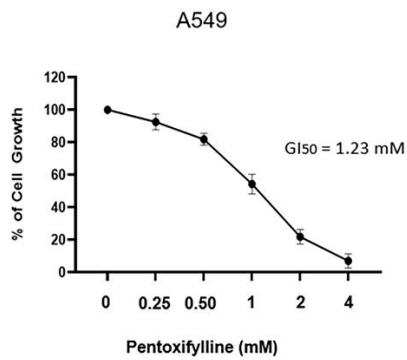

D)

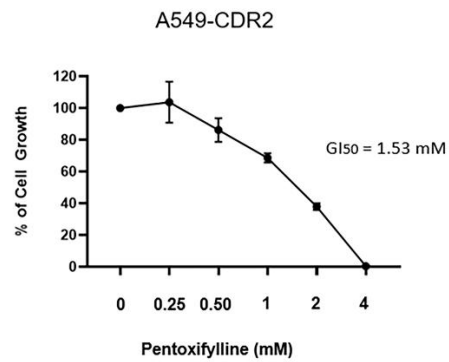

**Supplementary Figure 2.** Concentration-response curves of pentoxifylline on two NSCLC pairs of sensitive and MDR cell lines: (A) NCI-H460 vs. (B) NCI-H460/R; and (C) A549 vs. (D) A549-CDR2. Data is presented as percentage of cell growth and are the mean  $\pm$  SEM of a minimum of three independent experiments.

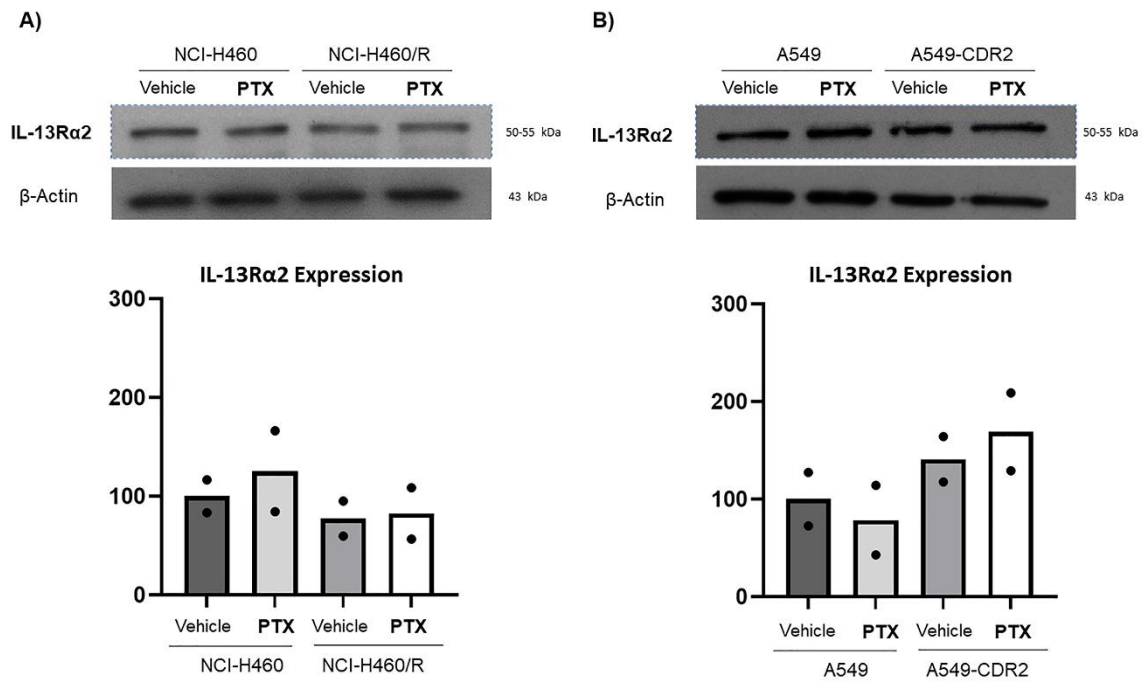

**Supplementary Figure 3.** Effect of pentoxifylline on the expression levels of IL-13R $\alpha$ 2, determined by Western Blot, on (A) NCI-H460 vs. NCI-H460/R and (B) A549 vs. A549-CDR2 cell lines, treated with vehicle (H<sub>2</sub>O) or pentoxifylline at 1.0 mM after 48 h treatment.  $\beta$ -Actin was used as loading control. Data is from two independent experiments.

A)

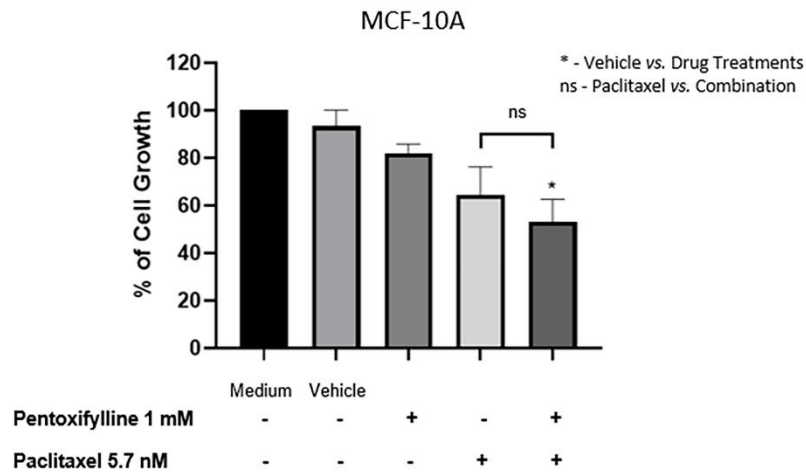

B)

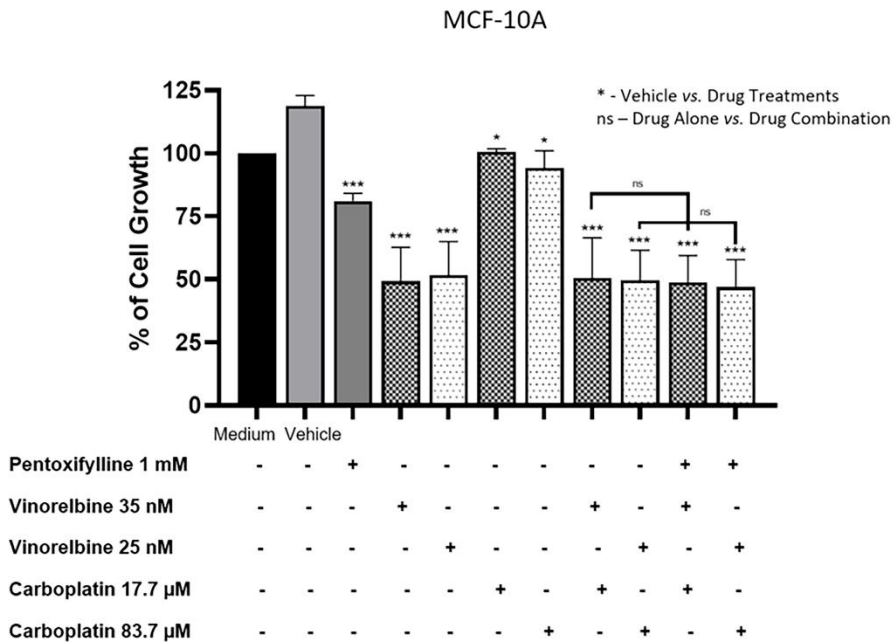

**Supplementary Figure 4.** Effect of the combined treatment consisting of pentoxifylline with (A) Paclitaxel and (B) Vinorelbine and/or Carboplatin, in the non-tumorigenic cell line MCF-10A, assessed by the SRB assay. Data is presented as a percentage of cell growth and are the mean  $\pm$  SEM of a minimum of independent experiments. \*  $P \leq 0.05$ ; \*\*\*  $P < 0.001$ ; ns:  $P > 0.05$ .
